# Supplementary material for: First‐in‐human phase 1 trial evaluating safety, pharmacokinetics, and pharmacodynamics of NLRP3 inflammasome inhibitor, GDC‐2394, in healthy volunteers
Source: PubMed Central journal article supplement — Clin Transl Sci. 2023 Jul 23;16(9):1653–66. doi: 10.1111/cts.13576 (PMC10499406; doi:10.1111/cts.13576), 2023-07-23
Supplement: CTS-16-1653-s002.pdf [file CTS-16-1653-s002.pdf]

## Listing of All Adverse Events

| Actual Treatment Arm                  |                                    |         |                             |
|---------------------------------------|------------------------------------|---------|-----------------------------|
| Subject ID <sup>a</sup>               | AE MedDRA Preferred Term           | Serious | Most Extreme Toxicity Grade |
| Treatment: DDI 900 mg BID + 10 mg MDZ |                                    |         |                             |
| 12                                    | Drug-induced liver injury          | Y       | 4                           |
| 18                                    | Haematoma                          | N       | 1                           |
|                                       | Fatigue                            | N       | 2                           |
|                                       | Abdominal distension               | N       | 1                           |
|                                       | Eyelid haematoma                   | N       | 1                           |
|                                       | Constipation                       | N       | 1                           |
|                                       | Drug-induced liver injury          | Y       | 4                           |
|                                       | Headache                           | N       | 1                           |
| 2                                     | Headache                           | N       | 1                           |
|                                       | Rash                               | N       | 1                           |
|                                       | Nausea                             | N       | 1                           |
|                                       | Headache                           | N       | 1                           |
| 20                                    | Myalgia                            | N       | 1                           |
| 26                                    | Rash                               | N       | 1                           |
|                                       | Rash                               | N       | 1                           |
| 27                                    | Sensory disturbance                | N       | 1                           |
|                                       | Dizziness                          | N       | 1                           |
|                                       | Sensory disturbance                | N       | 1                           |
|                                       | Disturbance in attention           | N       | 1                           |
|                                       | Fatigue                            | N       | 1                           |
|                                       | Headache                           | N       | 1                           |
|                                       | Head discomfort                    | N       | 1                           |
|                                       | Paraesthesia                       | N       | 1                           |
|                                       | Dizziness                          | N       | 1                           |
|                                       | Confusional state                  | N       | 1                           |
|                                       | Sensory disturbance                | N       | 1                           |
| 29                                    | Limb discomfort                    | N       | 1                           |
|                                       | Hangover                           | N       | 1                           |
| 30                                    | Contusion                          | N       | 1                           |
|                                       | Dry mouth                          | N       | 1                           |
|                                       | Malaise                            | N       | 1                           |
|                                       | Abdominal discomfort               | N       | 1                           |
|                                       | Fatigue                            | N       | 1                           |
|                                       | Oropharyngeal discomfort           | N       | 1                           |
| 37                                    | Alanine aminotransferase increased | N       | 2                           |
|                                       | Contusion                          | N       | 1                           |
| Treatment:<br>FES 600 mg              |                                    |         |                             |
| 14                                    | Skin laceration                    | N       | 1                           |
| 6                                     | Insomnia                           | N       | 1                           |
| 7                                     | Folliculitis                       | N       | 1                           |
| Treatment:<br>FES PLB                 |                                    |         |                             |
| 10                                    | Erythema                           | N       | 1                           |
| 41                                    | Phlebitis                          | N       | 1                           |
|                                       | Rhinitis                           | N       | 1                           |
| Treatment:<br>MAD C1 300 mg BID       |                                    |         |                             |

Investigator text for AEs encoded using MedDRA version 25.0. Only treatment emergent AEs are displayed. <sup>a</sup>Original participant IDs were replaced with dummy IDs to protect participant confidentiality.

| Actual Treatment Arm            | AE MedDRA Preferred Term          | Serious | Most Extreme Toxicity Grade |
|---------------------------------|-----------------------------------|---------|-----------------------------|
| Treatment:<br>MAD C1 300 mg BID |                                   |         |                             |
| 25                              | Epistaxis                         | N       | 1                           |
| 34                              | Change of bowel habit             | N       | 1                           |
|                                 | Upper respiratory tract infection | N       | 1                           |
| 39                              | Chest pain                        | N       | 1                           |
|                                 | Upper respiratory tract infection | N       | 1                           |
| 9                               | Ear infection                     | N       | 2                           |
|                                 | Headache                          | N       | 1                           |
|                                 | Headache                          | N       | 1                           |
|                                 | Upper respiratory tract infection | N       | 1                           |
| Treatment:<br>MAD C1 PLB        |                                   |         |                             |
| 32                              | Abdominal distension              | N       | 1                           |
|                                 | Nasal congestion                  | N       | 1                           |
|                                 | Liver function test increased     | N       | 3                           |
|                                 | Tonsillitis                       | N       | 1                           |
| Treatment:<br>MAD C2 900 mg BID |                                   |         |                             |
| 1                               | Dizziness                         | N       | 1                           |
| 11                              | Dizziness                         | N       | 1                           |
|                                 | Fatigue                           | N       | 1                           |
|                                 | Fatigue                           | N       | 1                           |
| 33                              | Abdominal pain                    | N       | 1                           |
|                                 | Headache                          | N       | 1                           |
|                                 | Headache                          | N       | 1                           |
| 8                               | Lethargy                          | N       | 1                           |
|                                 | Rash                              | N       | 1                           |
| Treatment:<br>MAD C2 PLB        |                                   |         |                             |
| 36                              | Abdominal distension              | N       | 1                           |
|                                 | Catheter site phlebitis           | N       | 1                           |
| Treatment:<br>SAD C1 150 mg     |                                   |         |                             |
| 21                              | Oropharyngeal pain                | N       | 1                           |
|                                 | Constipation                      | N       | 1                           |
| 23                              | Nausea                            | N       | 1                           |
| 24                              | Medical device site erythema      | N       | 1                           |
| 31                              | Constipation                      | N       | 1                           |
| Treatment:<br>SAD C1 PLB        |                                   |         |                             |
| 17                              | Erythema                          | N       | 1                           |
| 28                              | Abdominal pain                    | N       | 1                           |
|                                 | Nausea                            | N       | 1                           |

Investigator text for AEs encoded using MedDRA version 25.0. Only treatment emergent AEs are displayed. <sup>a</sup>Original participant IDs were replaced with dummy IDs to protect participant confidentiality.

| Actual Treatment Arm         | AE MedDRA Preferred Term          | Serious | Most Extreme Toxicity Grade |
|------------------------------|-----------------------------------|---------|-----------------------------|
| Treatment:<br>SAD C1 PLB     | Headache                          | N       | 1                           |
| Treatment:<br>SAD C2 450 mg  | Nausea                            | N       | 1                           |
| 38                           | Upper respiratory tract infection | N       | 1                           |
| 4                            | Phlebitis                         | N       | 1                           |
| 40                           | Vomiting                          | N       | 1                           |
|                              | Cyclic vomiting syndrome          | N       | 2                           |
| Treatment:<br>SAD C2 PLB     | Abdominal pain                    | N       | 1                           |
| 35                           |                                   |         |                             |
| Treatment:<br>SAD C3 900 mg  | Medical device site erythema      | N       | 1                           |
| 15                           | Catheter site pruritus            | N       | 1                           |
|                              | Upper respiratory tract infection | N       | 1                           |
| 16                           | Oropharyngeal pain                | N       | 1                           |
| 19                           | Phlebitis                         | N       | 1                           |
|                              | Nausea                            | N       | 1                           |
|                              | Dizziness                         | N       | 1                           |
| 3                            | Abdominal pain                    | N       | 1                           |
| Treatment:<br>SAD C4 1800 mg | Contusion                         | N       | 1                           |
| 13                           | Nausea                            | N       | 1                           |
| 22                           | Dizziness                         | N       | 1                           |
| 5                            | Muscle spasms                     | N       | 1                           |

Investigator text for AEs encoded using MedDRA version 25.0. Only treatment emergent AEs are displayed. <sup>a</sup>Original participant IDs were replaced with dummy IDs to protect participant confidentiality.
